# Supplementary material for: Distribution of polychlorinated organic by-products during the hydrolytic oxidation of chlorinated volatile organic pollutants over Pd–Ni-based catalysts
Source: Royal Society of Chemistry journal article supplement (doi:10.1039/d5ra08447d), 2026-01-01
Supplement: d5ra08447d1.pdf [file d5ra08447d1.pdf]

## Supplementary Information

### **Distribution of polychlorinated organic by-products during the hydrolysis oxidation of chlorinated volatile organic pollutants over Pd-Ni-based catalysts**

Yuqing Li, Bisi Lv<sup>1</sup>, Na Li\*, Wenjie Song, Jiahui Zhou, Caifei Ni, Wenlong Fu, Zhen Han

College of Safety and Environmental Engineering, Shandong University of Science and Technology, Qingdao, Shandong Province, 266590, P.R.China

#### **2.3 Catalytic performance evaluation**

The gas stream from the reactor was passed through a six-way valve into an Agilent 6890 gas chromatograph, which was equipped with a DB-624 capillary column (30 m × 0.32 mm × 1.8 μm) and was used as an analytical tool for the determination of 1,2-DCB and organic by-products using an FID detector. During the detection process, the column oven temperature was first held at 50 °C for 1 minute, then ramped up to 140 °C at a rate of 10 °C per minute, and finally maintained for 5 minutes. Method detection limits (MDLs) for representative chlorinated aromatic by-products including Benzene, Chlorobenzene, and Dichlorobenzene were determined in accordance with the U.S. EPA Method 40 CFR Part 136 (signal-to-noise ratio, S/N = 3). Under ambient temperature and pressure (25 °C, 101.325 kPa), the MDL ranges of the target analytes in gas-phase samples were determined to be  $1.5 \times 10^{-2} \sim 6.0 \times 10^{-2}$  ppm,  $1.0 \times 10^{-2} \sim 4.5 \times 10^{-2}$  ppm and  $1.0 \times 10^{-2} \sim 3.33 \times 10^{-2}$  ppm, respectively.

The concentrations of CO<sub>2</sub>, CO, and HCl at the outlet were analyzed online using an FTIR spectrometer (MKS, MultiGas™2030). The generation of Cl<sub>2</sub> was measured by bubbling the outlet gas stream into 0.0125 M NaOH solution for 20 minutes. The concentration of Cl<sup>-</sup> (produced from Cl<sub>2</sub>) was determined using an ultraviolet-visible spectrophotometer (Purkinje, TU-1810PC, China) with N,N-diethyl-p-phenylenediamine (DPD) as the indicator.

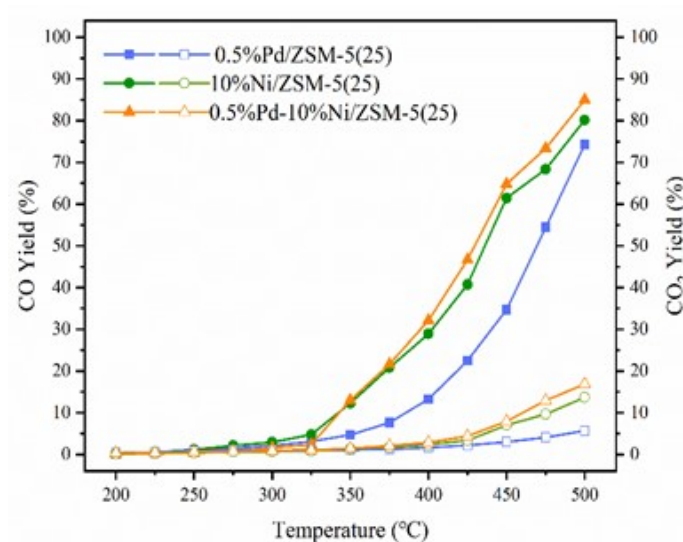

**Fig. S3.1** Variation of CO yield (left vertical axis) and CO<sub>2</sub> yield (right vertical axis) with temperature during hydrolysis oxidation of 1,2-DCB.

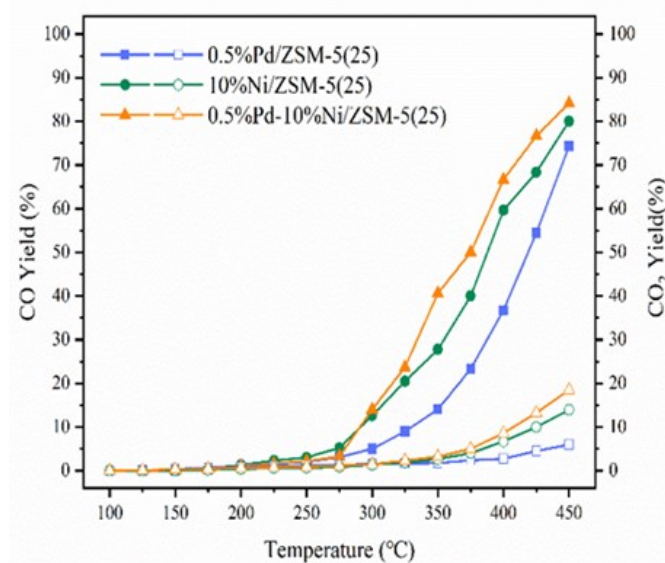

**Fig. S3.2** Variation of CO yield (left vertical axis) and CO<sub>2</sub> yield (right vertical axis) with temperature during hydrolysis oxidation of CB.

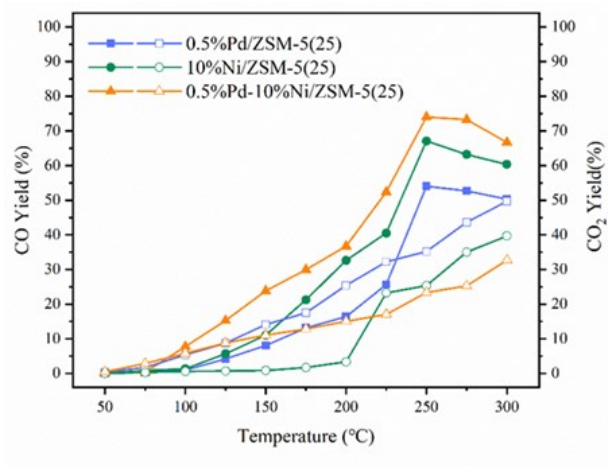

**Fig. S3.3** Variation of CO yield (left vertical axis) and CO<sub>2</sub> yield (right vertical axis) with temperature during hydrolysis oxidation of *o*-chlorophenol.
